# Supplementary material
Source: PubMed Central journal article supplement (PMC3111282)
Supplement: 1102129108_sapp.pdf [file 1102129108_sapp.pdf]

## Supporting Information

### Harbison & Clayton, Community interactions govern host switching

#### Appendix S1. Bibliography of published phoretic records in philopterid lice.

We surveyed the literature to locate all published records of phoretic lice by searching with keywords such as phoresis, phoretic, phoresy, Phthiraptera, lice, Mallophaga, Hippoboscidae, louse-fly and flat-fly. Because nearly all records of louse phoresis involve the family Philopteridae (suborder Ischnocera), we restricted our search to this family.

Adie H (1915) The sporogony of *Haemoproteus columbae*. *Indian J Med Res* 44:671-680.

Aube C (1857) Observation relative aux anoplures qui s'attachent aux insectes pour se faire transporter la ou ils doivent trouver une nourriture qui leur est commune avec eux. *Ann Soc Ent Fr* 3:161-162.

Ansari MAR (1947) Associations between the Mallophaga and the Hippoboscidae infesting birds. *J Bombay Nat Hist Soc* 46:509-516.

Ash J (1952) Records of Hippoboscidae (Dipt.) from Berkshire and Co., Durham, in 1950, with notes on their bionomics. *Entomol Mon Mag* 88:25-30.

Baker JR, Blackie EJ (1963) Phoresy of *Brueelia varia* (Burm.) (Mallophaga, Philopteridae) on *Ornithomyia avicularia* L. (Dipt. Hippoboscidae). *Entomol Mon Mag* 99:95.

Banks N (1920) Entomological notes from the Museum of Comparative Zoology. *Psyche* 27:20.

- Baum VH (1968) Biologie und Ökologie der Amsel Federlaus. *Angew Parasitol* 9:129-176.
- Bennett GF (1961) On three species of Hippoboscidae (Diptera) on birds in Ontario. *Can J Zool* 39:379-406.
- Bequaert J (1939) Hippoboscids from North American doves. *Science* 89:267-268.
- Bequaert J (1943) Notes on Hippoboscidae. 16. Hippoboscidae from southern Brasil, with the description of a new species of *Lynchia*. *J Parasitol* 29:131-135.
- Bequaert J (1953) The Hippoboscidae or louse-flies (Diptera) of mammals and birds. Part I. Structure, physiology and natural history. *Entomol Am* 32:1-209.
- Bequaert J (1957) The Hippoboscidae or louse-flies (Diptera) of mammals and birds. Part II. Taxonomy, evolution and revision of American genera and species. *Entomol Am* 36:417-611.
- Blagoveshtchensky DI (1956) Stroenie i. Systematicheskoe znacenie polovejsistemy puchoedov (Mallophaga). *Parazitol Zbornik* 16:5-88.
- Buttiker W (1949) Über die Übertragungsweise von Ektoparasiten bei Vögeln. *Die Vogel der Heimat* 19:74-77.
- Callot J (1946) Nouveau cas de phoresie. *Ann Parasitol Hum Comp* 21:379-380.
- Clay T (1949) Some problems in the evolution of a group of ectoparasites. *Evolution* 3:279-299.
- Clay T, Meinertzhagen R (1943) The relationship between Mallophaga and hippoboscids flies. *Parasitology* 35:11-16.
- Couch AB (1962) Phoretic mallophagans from hippoboscids of Mourning Doves, *Zenaidura macroura*. *J Parasitol* 48:497.

- Corbet GB (1956) The phoresy of Mallophaga on a population of *Ornithomyia fringillina* Curtis (Dipt., Hippoboscidae). *Entomol Mon Mag* 92:207-211.
- Davies DM (1958) Notes on avian hippoboscids. *J Parasitol* 44:239-240.
- Dubinín VB (1947) Investigation of the adaptation of ectoparasites. II. Ecological adaptations of feather-mites and Mallophaga. *Parazitol Zbornik* 9:191-222.
- Edwards R (1952) Flatflies taken in the laboratory during 1951. *Fair Isle Bird Obs Bull* 6:37-38.
- Eichler W (1939) Deutsche Lausfliegen. Ihre Lebensweise und ihre hygienische Bedeutung. *A Hyg Zool* 31:210-226.
- Eichler W (1946) Problems der Mallophagenforschung. *Die Vogel der Heimat* 16:205-217.
- Ewing HE (1927) The hippoboscid fly, *Ornithomyia avicularia* Linnaeus, as carrier of Mallophaga. *Ann Entomol Soc Am* 20:245-250.
- Ferriere C (1926) Le phoresie chez les insectes. *Mitt Schweiz Ent Ges* 13:489-496.
- Forsius R (1912) Über den Transport von Mallophagen durch Hippobosciden. *Med Soc Fauna Flora Fenn* 38:58-60.
- Guimaraes LR (1944) Mais um caso de associacao entre Mallophaga e Hippoboscidae. *Papeis Avulsos do Departamento de Zoologiz* 4:79-84.
- Hardy GH (1964) A note on phoresy. *J Ent Soc Austral* 1:36.
- Harrison L (1913) Notes and exhibits. *Proc Linn Soc NSW* 38:108-109.
- Hathaway CR (1943) Associacao entre Mallophaga e Hippoboscidae. *Memorias do Instituto Oswaldo Cruz* 38:413-417.
- Herman CM (1937) A case of superparasitism. *Bird-banding* 8:127.

- Hill DS, Wilson N, Corbet GB (1967) Mites associated with British species of *Ornithomya* (Diptera: Hippoboscidae). *J Med Entomol* 4:102-122.
- Hiregaudar LS, Khambata FS (1954) A record of Mallophagan phoresy by *Pseudolynchia maura* (Diptera, Hippoboscidae). *Curr Sci* 23:335.
- Hopkins GH (1947) Stray notes on Mallophaga-VII. *Ann Mag Nat Hist* 13:170-183.
- Iannacone JA (1992) Registro de un caso de phoresis: *Columbicola columbae* (L) (Phthiraptera: Insecta) por *Pseudolynchia canariensis* (Diptera: Insecta) en la zona de Lima, Peru. *Boletin de Lima* 84:17-18.
- Jacobson E (1911) Mallophaga transported by hippoboscidae. *Tijdschr Ent* 54:168-169.
- Johnson CW (1922) Bird lice (Mallophaga) attaching themselves to bird flies (Dipt. Hippoboscidae). *Ent News* 33:90.
- Keirans JE (1975) A review of the phoretic relationship between Mallophaga (Phthiraptera: Insecta) and Hippoboscidae (Diptera: Insecta). *J Med Entomol* 12:71-76.
- MacArthur K (1948) The louse flies of Wisconsin and adjacent states (Diptera, Hippoboscidae). *Bull Pub Mus City of Milwaukee* 8:367-440.
- Macchioni F, Magi M, Mancianti F, Perruci S (2005) Phoretic association of mites and Mallophaga with the pigeon fly *Pseudolynchia canariensis*. *Parasite* 12:277-279.
- Maa TC (1966) Studies in Hippoboscidae (Diptera). The Genus *Ornithoica* Rondani. *Pacif Ins Mon* 10:10-124, Addendum 139-140.
- Maa TC (1969) Studies in Hippoboscidae (Diptera). Part II. *Pacific Ins Mon* 20:1-261.
- Main AJ, Anderson KS (1970) The genera *Ornithoica*, *Ornithomyia*, and *Ornithoctona* in Massachusetts (Diptera: Hippoboscidae). *Bird-Banding* 41:300-306.

- Main AJ, Anderson KS. (1971) Avian ectoparasites at Manomet Bird Observatory. Part II. *Manomet Bird Observ Res Rept* 3:1-5.
- Marshall AG (1981) *The ecology of ectoparasitic insects*. Academic Press, London.
- Markov GS (1938). The presence of phoresy in Mallophaga. *Zool Zh* 17:634-636.
- Martin M (1934) Life history and habits of the pigeon louse (*Columbicola columbae* [Linnaeus]). *Can Entomol* 66:6-16.
- McAtee WL (1922) Bird lice (Mallophaga) attaching themselves to bird flies (Diptera, Hippoboscidae). *Entomol News* 33:90.
- Mjoberg E (1910) Studien uber Mallophagen und Anopluren. *Arkiv Zool* 6:1-297.
- Peters HS (1935) Mallophaga carried by hippoboscids. *Ann Carnegie Mus* 24:57-58.
- Proctor HC, Jones DN (2004) Geographical structuring of feather mite assemblages from the Australian Brush-turkey (Aves: Megapodiidae). *J Parasitol* 90:60-66.
- Reed EP (1932) Piojos y saran como parasitos de dipterous hippoboscidos Chilenos. *Rev Chilena Hist Nat* 35:102-103.
- Seguy E (1938) Synopsis des pupipares du groupe de l'Ornithomyia bioba (Doufour). *Encyl Ent Diptera* 9:75-78.
- Sharp D (1895) Mallophaga, bird-lice or biting lice. *Cambridge Nat Hist* 5:350-351.
- Spencer GJ (1928) External parasites on certain birds of British Columbia. *Can Entomol* 60:257-260.
- Spencer GJ (1938) Ectoparasites of birds and mammals of British Columbia. II. A preliminary list of Pupipara, louse flies. *Proc Entomol Soc Brit Columbia* 34:39-45.
- Thompson GB (1933) Association of hippoboscids with lice. *Nature* 132:605-606.

- Thompson GB (1934) The parasites of British birds and mammals. I. Notes and records. *Entomol Mon Mag* 70:133-136.
- Thompson GB (1935) Two further records of the association of Hippoboscidae and Mallophaga. *Entomol Mon Mag* 71:162.
- Thompson GB (1936) Some additional records of an association between Hippoboscidae and Mallophaga, together with a bibliography of the previous records. *Ann Mag Nat Hist* 18:309-312.
- Thompson GB (1937) Further notes on the association of Hippoboscidae and Mallophaga. *Ann Mag Nat Hist* 20:441-442.
- Thompson GB (1947) Association of Hippoboscidae and Mallophaga: further notes and records. *Ent Mon Mag* 83:212-214.
- Walter VG (1989) Phoresy and hyperparasitism in *Ornithomyia* (Diptera, Hippoboscidae) in the Federal Republic of Germany. *Angew Parasitol* 30:43-46.
- Wanach B (1910) Transport eines *Philoapterus* durch *Ornithomyia avicularia* L. *Ent Rundschau* 27:121.
- Warburton C (1928) *Ornithomyia avicularia* (Diptera: Hippoboscidae) as the carrier of Mallophaga, with some remarks on phoresis in insects. *Parasitology* 20:175-178.
- Ward RA (1953) Additional record of phoresy of Mallophaga on Hippoboscidae. *Bull Brooklyn Entomol Soc* 48:128.
- Wilson N (1964) Records of Hippoboscidae (Diptera) from Indiana. *J Med Entomol* 1:128-130.
